# Supplementary material for: Synthesis, structure and temperature sensing of a lanthanide-organic framework constructed from a pyridine-containing tetracarboxylic acid ligand
Source: Royal Society of Chemistry journal article supplement (doi:10.1039/c8ce01649f), 2018-01-01
Supplement: c8ce01649f1.pdf [file c8ce01649f1.pdf]

## Supporting information

### **Synthesis, structure and temperature sensing of lanthanide-organic framework constructed from a pyridine-containing tetracarboxylic acid ligand**

Dian Zhao,<sup>ab\*</sup> Huizhen Wang,<sup>b</sup> and Guodong Qian<sup>b\*</sup>

*a Key Laboratory of the Ministry of Education for Advanced Catalysis Materials, Department of Chemistry, Zhejiang Normal University, Jinhua, 321004, China.*

*b State Key Laboratory of Silicon Materials, Cyrus Tang Center for Sensor Materials and Applications, School of Materials Science and Engineering, Zhejiang University, Hangzhou 310027, China.*

\*Corresponding Author:

dzhao@zjnu.edu.cn; gdqian@zju.edu.cn;

Table S1 Comparing the performance of the LnMOF thermometers in terms of temperature range, relative sensitivity ( $S_r$ ) at high temperatures.

| MOF                                                                                                             | Range (K) | $S_r$ (%K <sup>-1</sup> ) | T (K) | Ref       |
|-----------------------------------------------------------------------------------------------------------------|-----------|---------------------------|-------|-----------|
| Eu <sub>0.19</sub> Tb <sub>0.81</sub> PDDI                                                                      | 313~473   | 0.37                      | 473   | This work |
| [Eu <sub>0.7</sub> Tb <sub>0.3</sub> (D-cam)(Himdc) <sub>2</sub> (H <sub>2</sub> O) <sub>2</sub> ] <sub>3</sub> | 100~450   | 0.11                      | 450   | 1         |
| Eu <sub>0.37</sub> Tb <sub>0.63</sub> -BTC-a                                                                    | 313~473   | 0.17                      | 473   | 2         |
| Eu@UIO-66-Hybrid film                                                                                           | 303~403   | 2.11                      | 403   | 3         |
| Dycpia                                                                                                          | 298~473   | 0.42                      | 473   | 4         |

Table S2. Crystallographic Data collection and Refinement result for **EuPDDI**.

|                                                      |                                                                               |
|------------------------------------------------------|-------------------------------------------------------------------------------|
| chemical formula                                     | C <sub>21</sub> H <sub>6</sub> Eu <sub>2</sub> N <sub>3</sub> O <sub>18</sub> |
| formula weight                                       | 892.21                                                                        |
| temperature (K)                                      | 293(2)                                                                        |
| wavelength (Å)                                       | 0.71073                                                                       |
| crystal system                                       | Monoclinic                                                                    |
| space group                                          | C 2/c                                                                         |
| a (Å)                                                | 25.132(2)                                                                     |
| b(Å)                                                 | 13.2260(8)                                                                    |
| c (Å)                                                | 15.1630(9)                                                                    |
| $\alpha$ (°)                                         | 90.000                                                                        |
| $\beta$ (°)                                          | 99.288(5)                                                                     |
| $\gamma$ (°)                                         | 90.000                                                                        |
| V(Å <sup>3</sup> )                                   | 4974.0(6)                                                                     |
| Z                                                    | 4                                                                             |
| density (calculated g/cm <sup>-3</sup> )             | 1.191                                                                         |
| absorbance coefficient (mm <sup>-1</sup> )           | 2.548                                                                         |
| F(000)                                               | 1692                                                                          |
| goodness of fit on F <sub>2</sub>                    | 1.083                                                                         |
| R1, wR2 (I>2 $\sigma$ (I))a                          | 0.1069, 0.3163                                                                |
| R1, wR2 (all data)a                                  | 0.1143, 0.3246                                                                |
| largest difference peak and hole (e/Å <sup>3</sup> ) | 6.496, -6.564                                                                 |

<sup>a</sup>R1 =  $\Sigma(|F_o| - |F_c|) / \Sigma|F_o|$ ; wR2 =  $[\Sigma w(|F_o| - |F_c|)^2 / \Sigma w F_o^2]^{1/2}$ .

Table S3 Selected Bond lengths [Å] and angles [°] for **EuPDDI**.

|                       |            |                       |          |
|-----------------------|------------|-----------------------|----------|
| Eu(1)-O(3)#1          | 2.335(11)  | O(11)#2-Eu(1)-O(6)    | 72.5(6)  |
| Eu(1)-O(11)#2         | 2.360(12)  | O(16)#3-Eu(1)-O(6)    | 147.5(5) |
| Eu(1)-O(16)#3         | 2.382(12)  | O(1)-Eu(1)-O(6)       | 73.5(6)  |
| Eu(1)-O(1)            | 2.398(14)  | O(10)-Eu(1)-O(6)      | 75.8(6)  |
| Eu(1)-O(10)           | 2.413(12)  | O(6U)-Eu(1)-O(6)      | 101.4(8) |
| Eu(1)-O(6U)           | 2.442(17)  | O(11)#2-Eu(1)-O(9)    | 70.1(6)  |
| Eu(1)-O(6)            | 2.535(14)  | O(16)#3-Eu(1)-O(9)    | 145.0(5) |
| Eu(1)-O(9)            | 2.560(17)  | O(1)-Eu(1)-O(9)       | 101.1(7) |
| Eu(1)-O(3)            | 2.769(13)  | O(10)-Eu(1)-O(9)      | 124.5(5) |
| Eu(1)-Eu(1)#1         | 4.0702(13) | O(6U)-Eu(1)-O(9)      | 70.1(7)  |
| O(3)-Eu(1)#1          | 2.335(11)  | O(6)-Eu(1)-O(9)       | 51.7(6)  |
| O(11)-Eu(1)#4         | 2.360(12)  | O(3)#1-Eu(1)-O(3)     | 74.5(4)  |
| O(16)-Eu(1)#5         | 2.382(12)  | O(11)#2-Eu(1)-O(3)    | 69.1(4)  |
| O(3)#1-Eu(1)-O(11)#2  | 73.0(5)    | O(16)#3-Eu(1)-O(3)    | 68.5(4)  |
| O(3)#1-Eu(1)-O(16)#3  | 77.4(4)    | O(1)-Eu(1)-O(3)       | 113.8(5) |
| O(11)#2-Eu(1)-O(16)#3 | 133.2(4)   | O(10)-Eu(1)-O(3)      | 50.4(3)  |
| O(3)#1-Eu(1)-O(1)     | 145.1(5)   | O(6U)-Eu(1)-O(3)      | 140.4(6) |
| O(11)#2-Eu(1)-O(1)    | 141.8(6)   | O(6)-Eu(1)-O(3)       | 117.8(6) |
| O(16)#3-Eu(1)-O(1)    | 75.1(5)    | O(9)-Eu(1)-O(3)       | 138.9(6) |
| O(3)#1-Eu(1)-O(10)    | 124.2(4)   | O(3)#1-Eu(1)-Eu(1)#1  | 41.0(3)  |
| O(11)#2-Eu(1)-O(10)   | 78.9(5)    | O(11)#2-Eu(1)-Eu(1)#1 | 65.8(3)  |
| O(16)#3-Eu(1)-O(10)   | 89.1(5)    | O(16)#3-Eu(1)-Eu(1)#1 | 68.0(3)  |
| O(1)-Eu(1)-O(10)      | 76.5(5)    | O(1)-Eu(1)-Eu(1)#1    | 138.2(5) |
| O(3)#1-Eu(1)-O(6U)    | 81.4(5)    | O(10)-Eu(1)-Eu(1)#1   | 83.6(3)  |
| O(11)#2-Eu(1)-O(6U)   | 132.4(5)   | O(6U)-Eu(1)-Eu(1)#1   | 116.0(5) |
| O(16)#3-Eu(1)-O(6U)   | 75.9(6)    | O(6)-Eu(1)-Eu(1)#1    | 136.2(5) |
| O(1)-Eu(1)-O(6U)      | 71.4(6)    | O(9)-Eu(1)-Eu(1)#1    | 120.4(5) |
| O(10)-Eu(1)-O(6U)     | 147.1(5)   | O(3)-Eu(1)-Eu(1)#1    | 33.6(2)  |
| O(3)#1-Eu(1)-O(6)     | 134.8(5)   | Eu(1)#1-O(3)-Eu(1)    | 105.5(4) |

Symmetry transformations used to generate equivalent atoms: #1 -x+1/2,-y+1/2,-z+1; #2 -x+1/2,y-1/2,-z+1/2; #3 x,-y+1,z+1/2; #4 -x+1/2,y+1/2,-z+1/2; #5 x,-y+1,z-1/2.

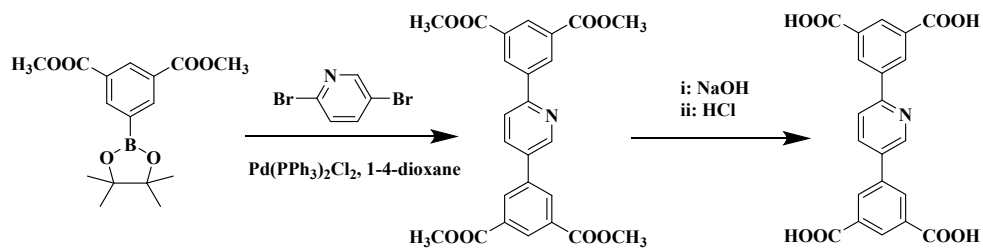

Fig. S1 Synthesis of the organic ligand  $\text{H}_4\text{PDDI}$  applied to construct  $\text{LnPDDI}$ .

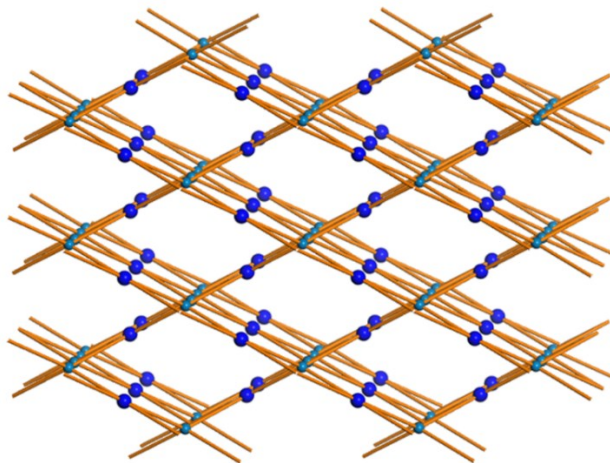

Fig. S2 The underlying network of  $\text{EuPDDI}$ .

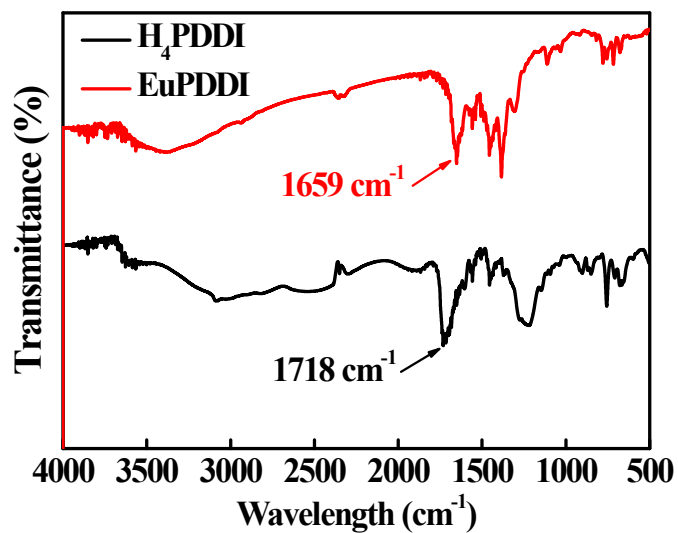

Fig. S3 FT-IR spectra of  $\text{H}_4\text{PDDI}$  and  $\text{EuPDDI}$

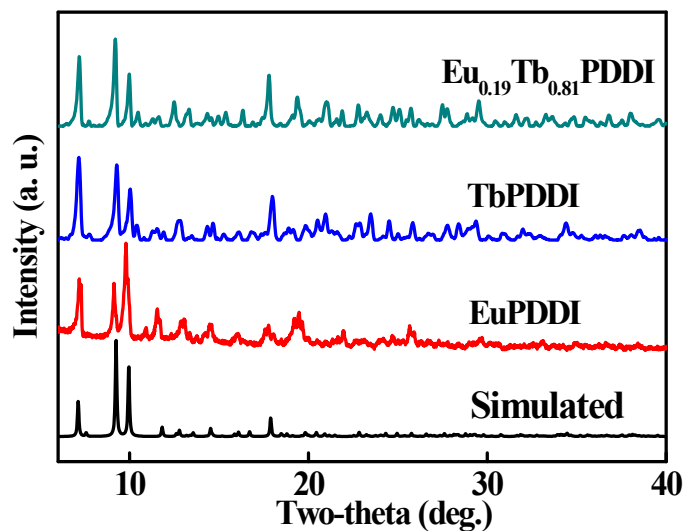

Fig. S4 Powder XRD patterns of EuPDDI, TbPDDI, Eu<sub>0.19</sub>Tb<sub>0.81</sub>PDDI

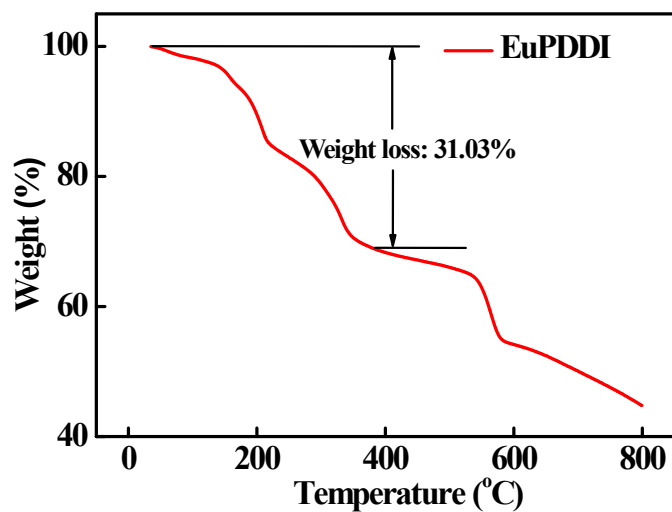

Fig. S5. TG curves of EuPDDI.

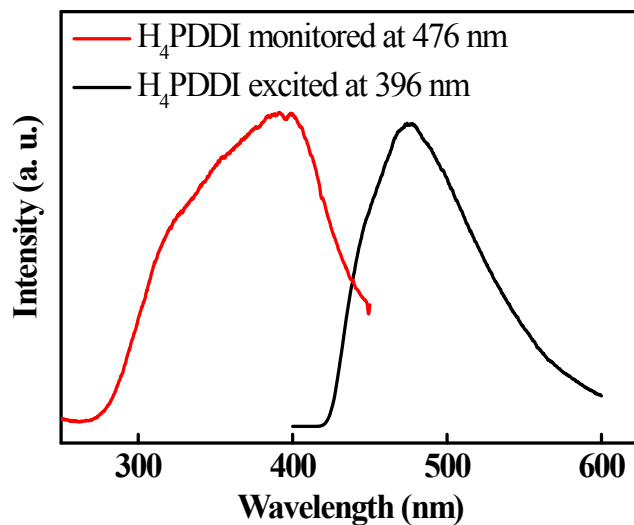

Fig. S6 Excitation and emission spectra of the H<sub>4</sub>PDDI ligand at room temperature

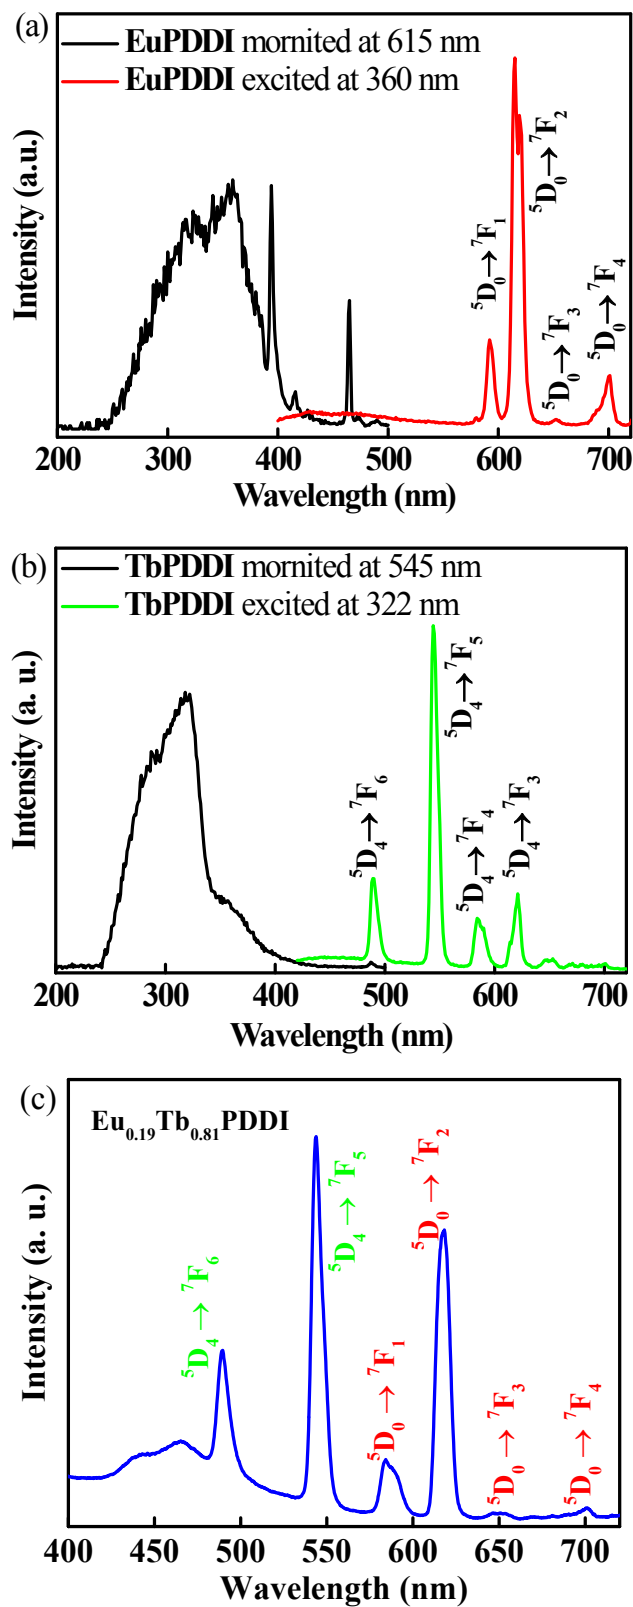

Fig. S7 (a) Excitation and emission Spectra of **EuPDDI**; (b) Excitation and emission Spectra of **TbPDDI**; (c) Excitation and emission Spectra of **Eu<sub>0.19</sub>Tb<sub>0.81</sub>PDDI**.

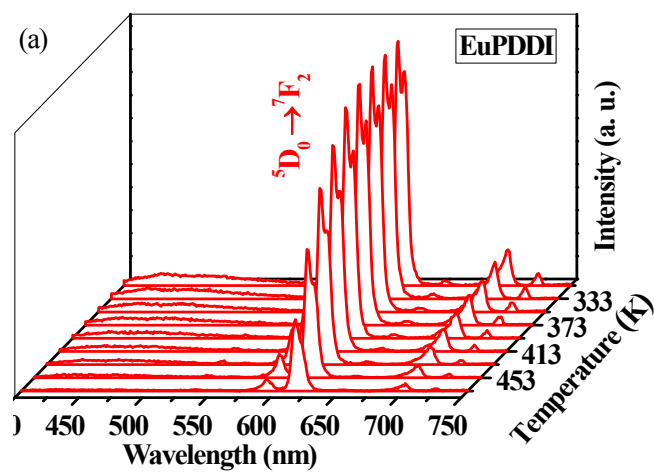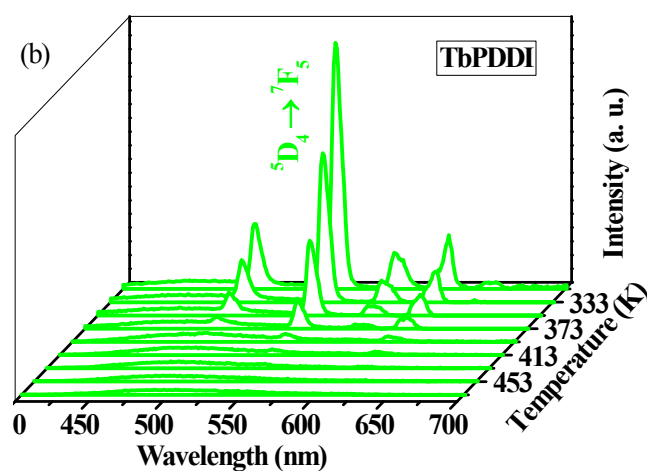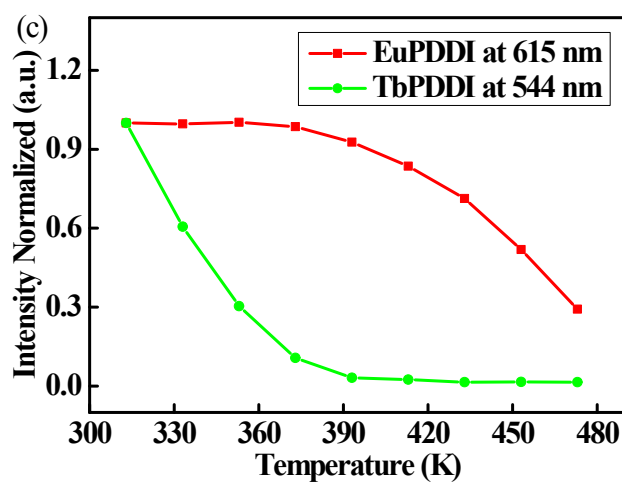

Fig. S8 (a) Temperature dependent emission spectra of **EuPDDI** recorded between 313 and 473 K; (b) Temperature dependent emission spectra of **TbPDDI** recorded between 313 and 473 K; (c) Temperature dependent normalized intensity of **EuPDDI** at 615 nm and **TbPDDI** at 544 nm recorded between 313 and 473 K.

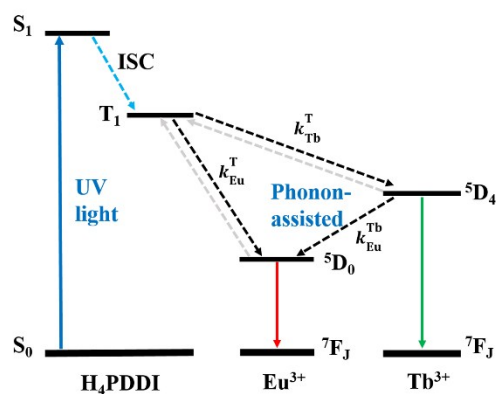

Fig. S9 Schematic representation of energy absorption, migration, emission, and processes in mixed LnMOF  $\text{Eu}_{0.19}\text{Tb}_{0.81}\text{PDDI}$ . Abbreviations: S = singlet; T = triplet; ISC = intersystem crossing; k = nonradiative and radiative transition probability. The solid arrows represent absorption and radiative transitions; dotted arrows indicate nonradiative transitions.

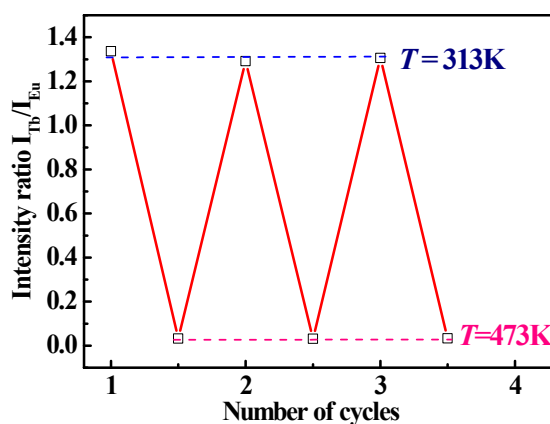

Fig. S10 The intensity ratio of  $\text{Tb}^{3+}$  (545 nm) to  $\text{Eu}^{3+}$  (615 nm) for  $\text{Eu}_{0.19}\text{Tb}_{0.81}\text{PDDI}$  in the cycles of heating and cooling (repeatability better than 98%).

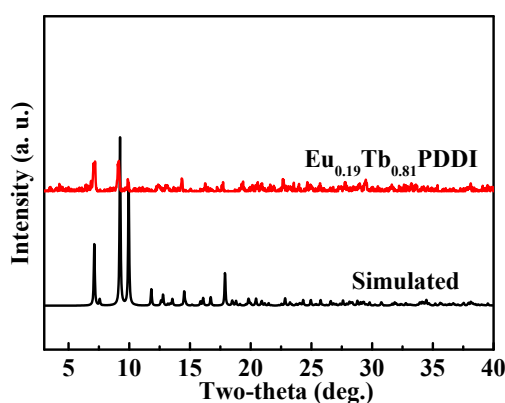

Fig. S11 Powder XRD profile of  $\text{Eu}_{0.19}\text{Tb}_{0.81}\text{PDDI}$  after high temperature photoluminescence measurements.

## References

1. Y.-H. Han, C.-B. Tian, Q.-H. Li and S.-W. Du, *J. Mater. Chem. C*, 2014, **2**, 8065-8070.



2. H. Wang, D. Zhao, Y. Cui, Y. Yang and G. Qian, *J. Solid State Chem.*, 2017, **246**, 341-345.
3. J. Feng, S. Gao, T. Liu, J. Shi, and R. Cao, *ACS Appl. Mater. Interfaces*, 2018, **10**, 6014-6023.
4. T. Xia, Y. Cui, Yu Yang and G. Qian, *J. Mater. Chem. C*, 2017, **5**, 5044-5047.
